# Supplementary material
Source: Springer Nature journal article supplement (https://www.springermedizin.de/resource/supplementary/12885_2013_5236_MOESM2_ESM.pdf/9466250)
Supplement: MOESM2 [file 9466250]

**A****UCSC Genome Browser - *AKT1* promoter**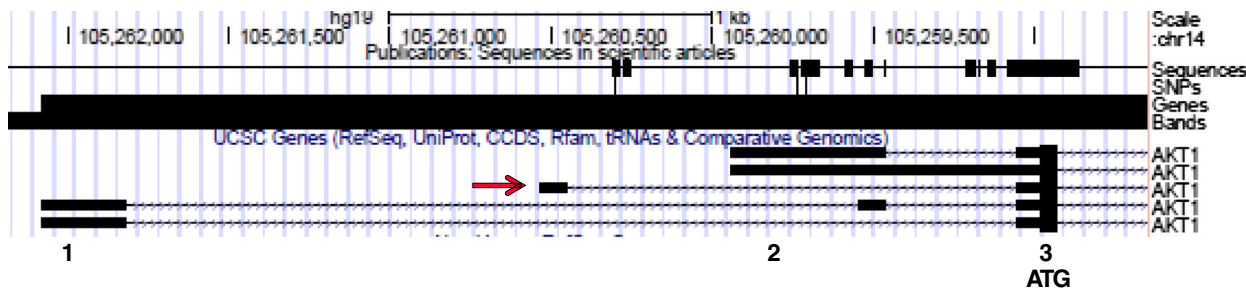**B****Human *AKT1* Transcripts (GenBank)**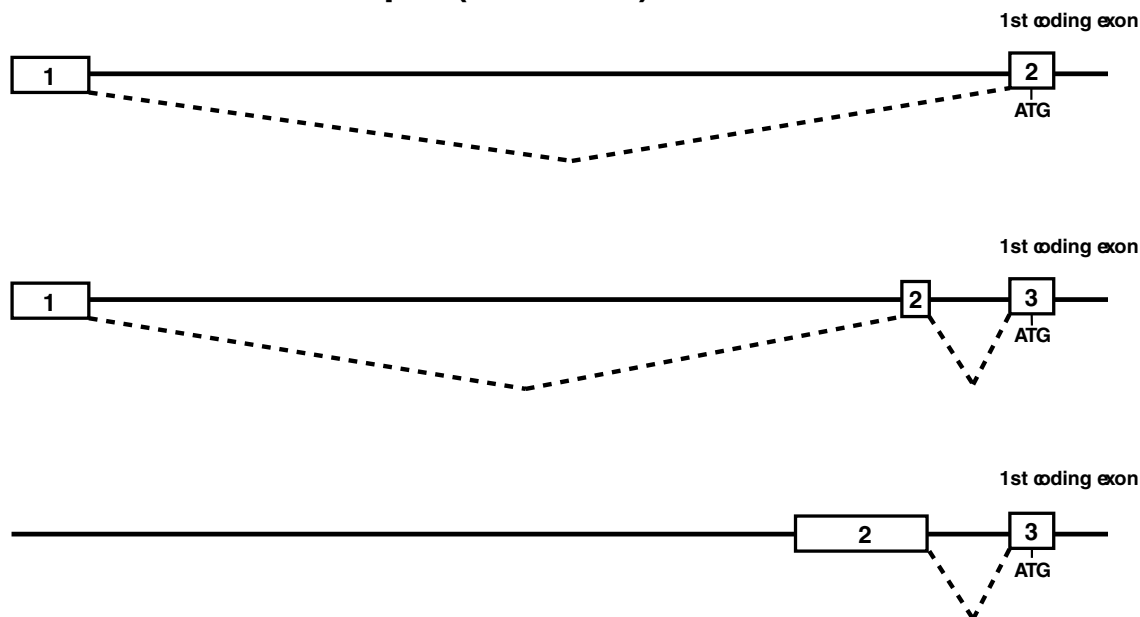**C**

Human-AGTCCTGCGGT GCCT TCCTC GAGTCTGGCC **TGCTTT**---CCAT-**CTGCTAAG**TACTT **GGGGCATTTCCTCTTT**---**GG**  
 Mouse-----TTTAGTCGCC**CTGCTTGCTGAG**-----**GGAAGGGCTCTTCTCTTTCTTGGGCCAG**
